# Supplementary material for: Interconnected TiOx/carbon hybrid framework incorporated silicon for stable lithium ion battery anodes
Source: Royal Society of Chemistry journal article supplement (doi:10.1039/c5ta00964b), 2015-01-01
Supplement: c5ta00964b1.pdf [file c5ta00964b1.pdf]

## Supplementary Information

### Interconnected TiO<sub>x</sub>/carbon hybrid framework incorporated silicon for stable lithium ion battery anodes

Ming-Shan Wang, Wei-Li Song and Li-Zhen Fan\*

Institute of Advanced Materials and Technology, University of Science and Technology Beijing,  
Beijing, 100083, China

\* Corresponding authors: Tel./fax: +86-10-62334311, E-mail: fanlizhen@ustb.edu.cn

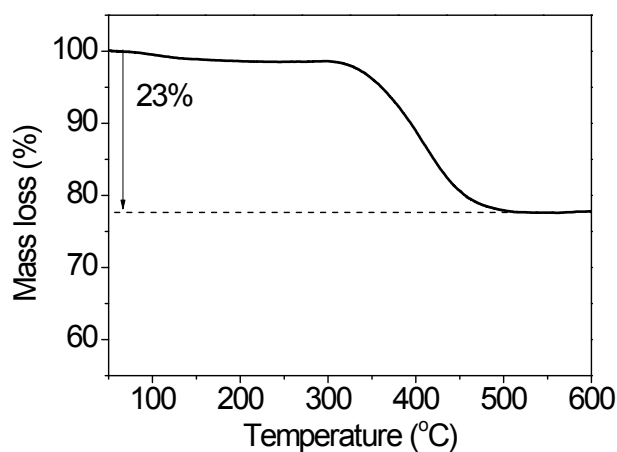

Figure S1 TGA curve of Si/TiO<sub>x</sub>/C under air.

Table S1 The weight percentage of Si in Si/TiO<sub>x</sub>/C.

| Sample                 | W <sub>c</sub> (%) | W <sub>Si/TiO<sub>x</sub></sub> (%) | W <sub>Si</sub> in Si/TiO <sub>x</sub> (%) | W <sub>TiO<sub>x</sub></sub> (%) | W <sub>Si</sub> (%) |
|------------------------|--------------------|-------------------------------------|--------------------------------------------|----------------------------------|---------------------|
| Si/TiO <sub>x</sub> /C | 23                 | 77                                  | 45                                         | 43                               | 34                  |

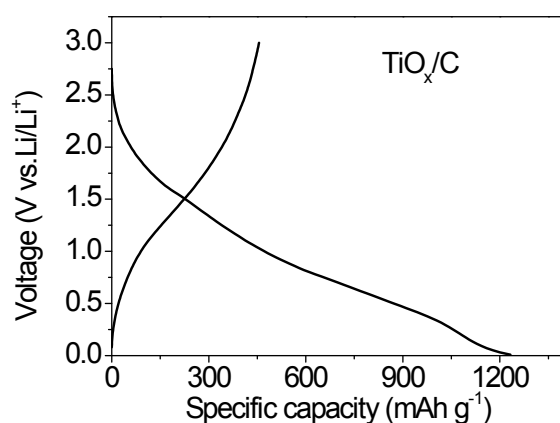

Figure S2. The initial charge-discharge potential profiles of  $\text{TiO}_x/\text{C}$  electrode in a voltage window of 0.01-3 V vs.  $\text{Li}/\text{Li}^+$  at a current density of  $100 \text{ mA g}^{-1}$ .

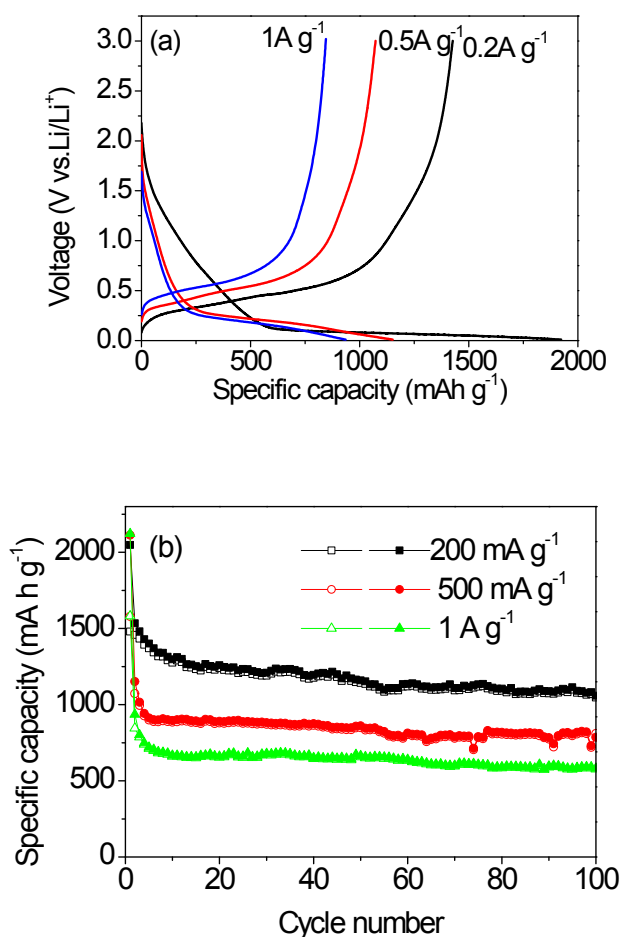

Figure S3(a) (a) charge-discharge potential profiles of  $\text{Si}/\text{TiO}_x/\text{C}$  at different current density (0.01-3.0 V); (b) the cycling performance of pure  $\text{Si}/\text{TiO}_x/\text{C}$  electrodes at different current density (0.01-3.0 V, open: Li insertion, solid: Li extraction).

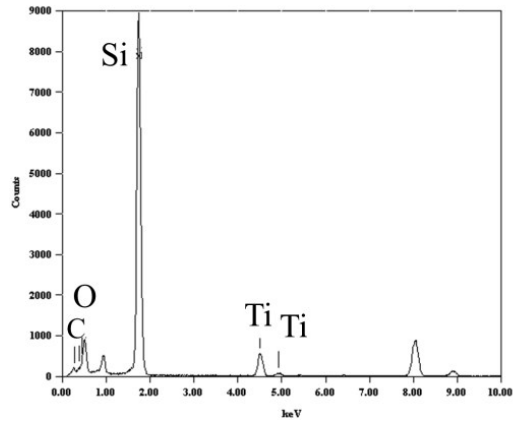

Figure S4. The EDX spectrum of Si/TiO<sub>x</sub>/C before cycling.

Table S2 The electrochemical performance of similarly Si/TiO<sub>2</sub> composites

| materials                                      | Cycle numbers | Reversible capacity (mAh g <sup>-1</sup> ) | Rate capability (mAh g <sup>-1</sup> )                                               | Ref. |
|------------------------------------------------|---------------|--------------------------------------------|--------------------------------------------------------------------------------------|------|
| ALD TiO <sub>2</sub> coated silicon nanowires  | 100           | 1600 (0.4A g <sup>-1</sup> )               | 1300 (4A g <sup>-1</sup> )<br>540 (12A g <sup>-1</sup> )                             | 29   |
| Si@TiO <sub>2-x</sub> /C mesoporous microfiber | 50            | 900 (0.2 A g <sup>-1</sup> )               | 1000 (4 A g <sup>-1</sup> )<br>939 (12A g <sup>-1</sup> )                            | 28   |
| Si@TiO <sub>2</sub> Nanospheres                | 100           | 804 (0.42A g <sup>-1</sup> )               | 795(4.2A g <sup>-1</sup> )                                                           | 31   |
| Si-ATO-Si                                      | 100           | 1500 (1.4 A g <sup>-1</sup> )              | 1823 (0.7A g <sup>-1</sup> )<br>1480 (1.4A g <sup>-1</sup> )                         | 34   |
| TiO <sub>2</sub> /Si composites                | 900           | 710 (3.4 A g <sup>-1</sup> )               | 1311 (8.7 A g <sup>-1</sup> )<br>1140 (10 A g <sup>-1</sup> )                        | 38   |
| Si/TiO <sub>2</sub> nanowire                   | 200           | 802 (0.1A g <sup>-1</sup> )                | 800 (0.8A g <sup>-1</sup> )<br>600(1.6A g <sup>-1</sup> )                            | 35   |
| silicon/graphite/TiO <sub>2</sub>              | 55            | 720 (0.048 Ag <sup>-1</sup> )              | -                                                                                    | 37   |
| TiO <sub>2</sub> /C/Si composite               | 50            | 861 (0.4Ag <sup>-1</sup> )                 | 600 (4A g <sup>-1</sup> )<br>480 (8A g <sup>-1</sup> )<br>875 (5 A g <sup>-1</sup> ) | 39   |
| This work                                      | 100           | 1696 (0.1 A g <sup>-1</sup> )              | 820(10 Ag <sup>-1</sup> )<br>754 (15 A g <sup>-1</sup> )                             |      |
